# Supplementary material for: Patient-provider communication about sexual concerns in cancer: a systematic review
Source: Springer Nature journal article supplement (doi:10.1007/s11764-016-0577-9), 2016-11-17
Supplement: MOESM1 [file 11062926]

Supplemental Table

Quality Criteria Met by Included Studies, By Year of Publication

| **Study** | **Setting/ population Described** | **Eligibility Criteria Described** | **Sample Characteristics Described** | **Rate of Enrollment/ Completion Reported** | **CSC Measure Had Validity/ Reliability Data** | **Total Number of Criteria Met, of 5** |
| --- | --- | --- | --- | --- | --- | --- |
| Stead 2003 [[26](#_ENREF_26)] | ● | ● | ● | ● | ○ | 4 |
| Lemieux 2004[[50](#_ENREF_50)] | ● | ● | ● | ● | ● | 5 |
| Lindau 2007[[51](#_ENREF_51)] | ● | ● | ● | ● | ● | 5 |
| Khoo 2009[[40](#_ENREF_40)] | ● | ● | ● | ○ | ○ | 3 |
| Chorost 2000[[64](#_ENREF_64)] | ● | ● | ● | ● | ○ | 4 |
| Hendren 2005[[47](#_ENREF_47)] | ● | ● | ● | ● | ● | 5 |
| Boyd 2006[[43](#_ENREF_43)] | ● | ● | ● | ● | ○ | 4 |
| Cox 2006[[44](#_ENREF_44)] | ● | ● | ● | ● | ○ | 4 |
| Hendren 2007[[38](#_ENREF_38)] | ● | ● | ● | ○ | ● | 4 |
| Hilarius 2008 [[58](#_ENREF_58)] | ● | ● | ● | ● | ● | 5 |
| Southard 2009[[54](#_ENREF_54)] | ● | ● | ● | ● | ○ | 4 |
| Errihani 2010[[45](#_ENREF_45)] | ● | ● | ● | ● | ○ | 4 |
| White 2011[[57](#_ENREF_57)] | ● | ● | ● | ● | ● | 4 |
| Flynn 2012[[29](#_ENREF_29)] | ● | ● | ● | ○ | ● | 4 |
| Forbat 2012[[46](#_ENREF_46)] | ● | ● | ● | ● | ○ | 4 |
| Lewis 2012[[39](#_ENREF_39)] | ● | ● | ● | ● | ● | 5 |
| Scanlon 2012[[53](#_ENREF_53)] | ● | ● | ● | ● | ○ | 4 |
| Scheer 2012[[42](#_ENREF_42)] | ● | ● | ● | ○ | ● | 4 |
| Silva Lara 2012[[63](#_ENREF_63)] | ● | ● | ● | ○ | ○ | 3 |
| Kedde 2013[[61](#_ENREF_61)] | ● | ● | ● | ○ | ○ | 3 |
| Huang 2013[[48](#_ENREF_48)] | ● | ● | ● | ● | ● | 5 |
| Ussher 2013[[55](#_ENREF_55)] | ● | ● | ● | ● | ● | 5 |
| Gilbert 2014[[59](#_ENREF_59)] | ● | ● | ● | ○ | ● | 4 |
| Mohamed 2014[[52](#_ENREF_52)] | ● | ● | ● | ● | ● | 5 |
| Oskay 2014[[62](#_ENREF_62)] | ● | ● | ● | ○ | ○ | 3 |
| Krouwel 2015[[60](#_ENREF_60)] | ● | ● | ● | ○ | ● | 4 |
| Kunneman 2015[[49](#_ENREF_49)] | ● | ● | ● | ● | ● | 5 |
| Vermeer 2015a[[56](#_ENREF_56)] | ● | ● | ● | ● | ● | 5 |
| Vermeer 2015b[[27](#_ENREF_27)] | ● | ● | ● | ○ | ● | 4 |

Note: Shaded circles indicate the study meets the criterion; unshaded circles indicate not meeting the criterion.
